# Supplementary material
Source: publisher figshare collection journal article supplement (https://tandf.figshare.com/articles/dataset/_/7704758)
Supplement: Supplementary file 1 [file 1]

*In: Pohe et al. 2019. Invertebrate fauna of ephemeral streams on Hauturu-o-Toi/Little Barrier Island in northern New Zealand. New Zealand Journal of Zoology.*

**Supplementary Table S1.** Metadata of sampling sites used in the study.

| Region     | Site label | Stream/Creek/River             | Latitude<br>(NZGD2000) | Longitude<br>(NZGD2000) | Collector and year of collection          |
|------------|------------|--------------------------------|------------------------|-------------------------|-------------------------------------------|
| Hauturu    | H1         | Parihakoakoa Stream            | -36.21140              | 175.05270               | Winterbourn 1963; Pohe, Wade, Ball 2014   |
| Hauturu    | H2         | Tirikakawa Stream              | -36.22360              | 175.06890               | Winterbourn 1963; Pohe, Wade, Ball 2014   |
| Hauturu    | H3         | Awaroa Stream                  | -36.22660              | 175.08400               | Winterbourn 1963; Pohe, Wade, Ball 2014   |
| Hauturu    | H4         | Hut Bay Creek                  | -36.22500              | 175.06920               | Pohe, Wade, Ball 2014                     |
| Hauturu    | H5         | Haowhenua Stream               | -36.20480              | 175.05060               | Winterbourn 1963; Pohe, Wade, Ball 2014   |
| Coromandel | C1         | Mangatu Stream                 | -36.66482              | 175.53563               | Waikato Regional Council, 2009 and 2010   |
| Coromandel | C2         | Five Mile Stream               | -36.95777              | 175.64248               | Waikato Regional Council, 2007 and 2008   |
| Coromandel | C3         | Takatakahia Stream             | -37.15083              | 175.70747               | Waikato Regional Council, 2002 and 2003   |
| Coromandel | C4         | Waiomu Steam                   | -37.02567              | 175.52628               | Waikato Regional Council, 2008 and 2009   |
| Coromandel | C5         | Whakanekeneke Stream           | -36.73871              | 175.51525               | Waikato Regional Council, 2002 and 2003   |
| Auckland   | A1         | Aroaro Stream                  | -36.99574              | 175.13399               | Auckland Regional Council, 2009 and 2010  |
| Auckland   | A2         | Cascade Stream                 | -36.88890              | 174.52212               | Auckland Regional Council, 2009 and 2010  |
| Auckland   | A3         | Mangatawhiri River             | -37.04967              | 175.18077               | Auckland Regional Council, 2009 and 2010  |
| Auckland   | A4         | Marawhara Stream               | -36.94013              | 174.46858               | Auckland Regional Council, 2009 and 2010  |
| Auckland   | A5         | Mahurangi River (Right Branch) | -36.44538              | 174.66219               | Auckland Regional Council, 2009 and 2010  |
| Whangarei  | W1         | Pukenui Stream                 | -35.70248              | 174.26354               | Northland Regional Council, 2012 and 2013 |
| Whangarei  | W2         | Mangahahuru Stream             | -35.63994              | 174.31311               | Northland Regional Council, 2012 and 2013 |
| Whangarei  | W3         | Hatea River                    | -35.71100              | 174.32972               | Northland Regional Council, 2012 and 2013 |
| Whangarei  | W4         | Otaika Stream                  | -35.77783              | 174.27764               | Northland Regional Council, 2012 and 2013 |
| Whangarei  | W5         | Waiarohia Stream               | -35.69888              | 174.29950               | Northland Regional Council, 2012 and 2013 |
