# Supplementary material
Source: publisher figshare collection journal article supplement (https://tandf.figshare.com/articles/dataset/_/7704758)

*In: Pohe et al. 2019. Invertebrate fauna of ephemeral streams on Hauturu-o-Toi/Little Barrier Island in northern New Zealand. New Zealand Journal of Zoology.*

**Supplementary Figure S2.** Photos of select Hauturu streams with almost no surface flow (taken mid-January 2014).

**A.** Awaroa Stream (Photo: Olly Ball).

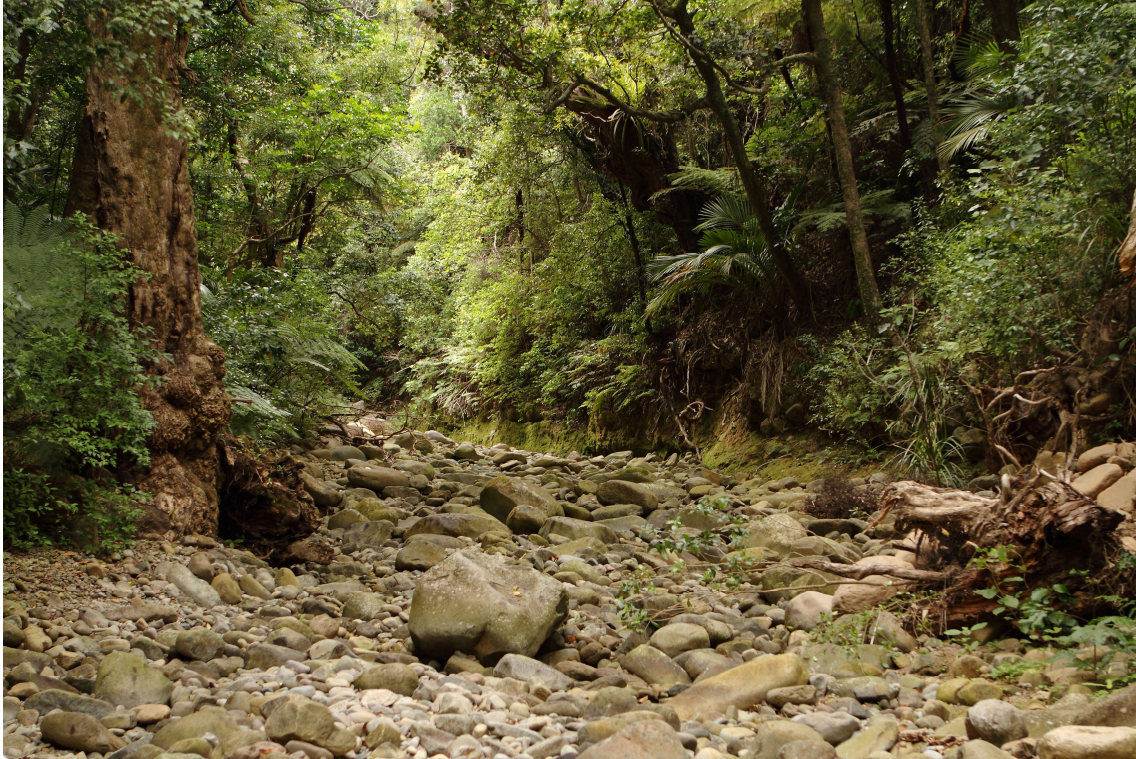

**B.** Haowhenua Stream (Photo: Lyn Wade).

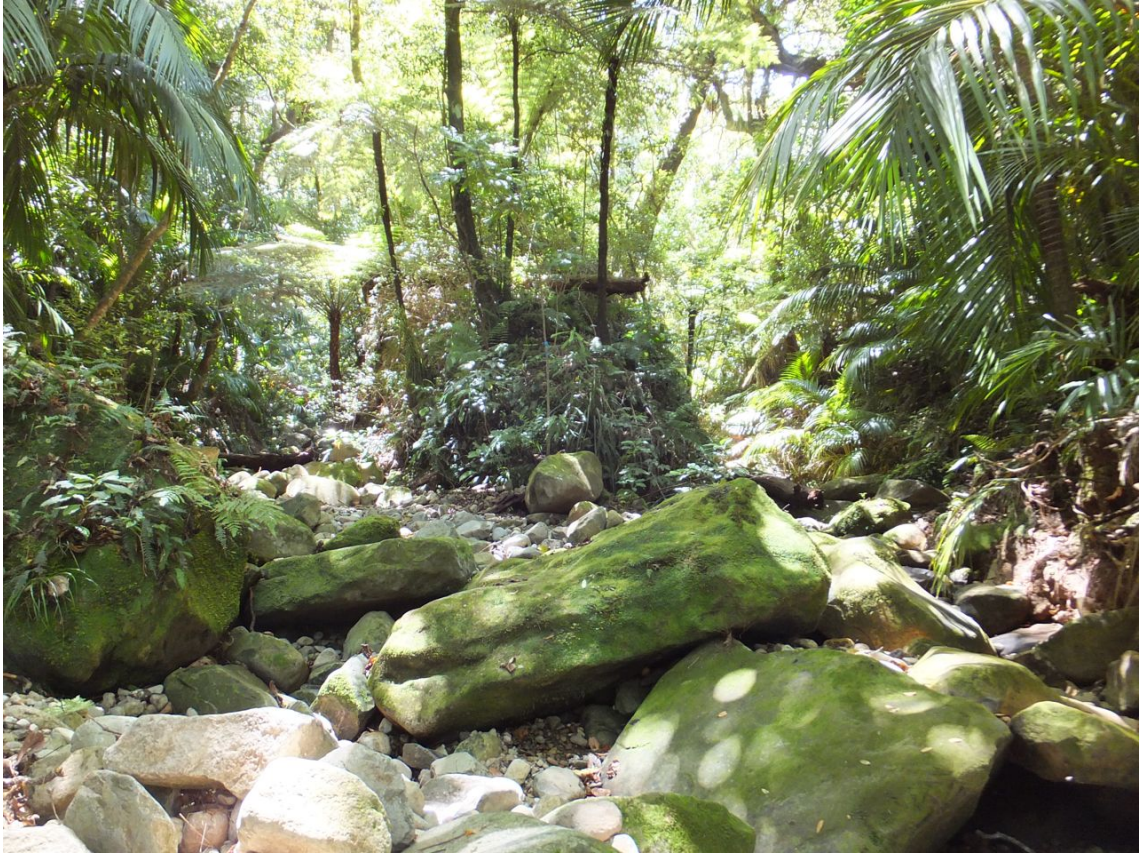



C. Tirikakawa Stream (Photo: Olly Ball).

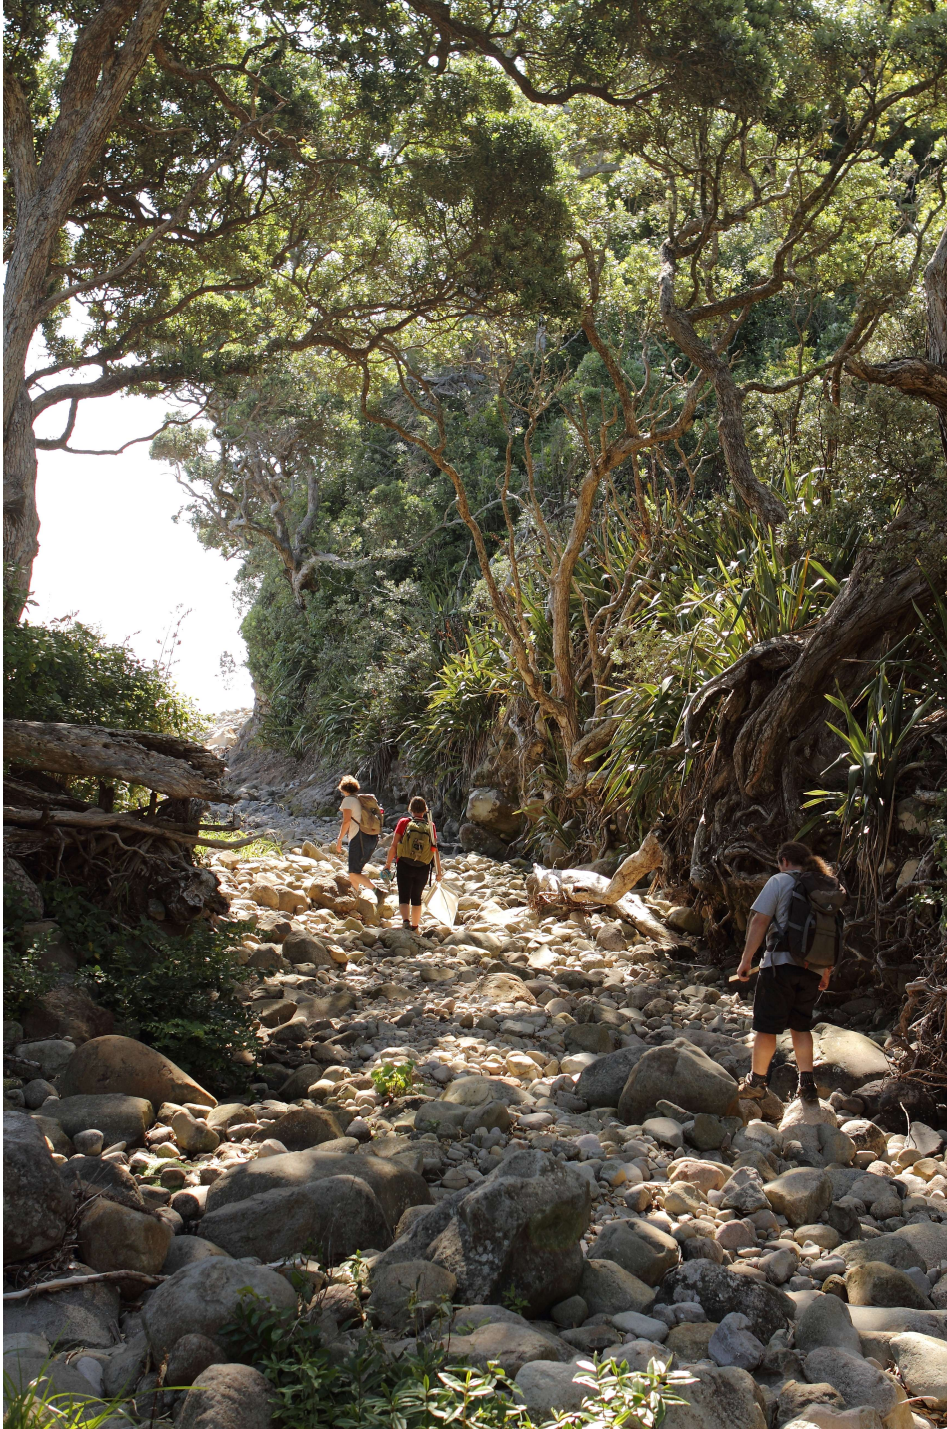

Supplement: Supplementary file 2 [file 1]
